# Supplementary material for: Hypothalamic miR-30 regulates puberty onset via repression of the puberty-suppressing factor, Mkrn3
Source: PLOS journal article supplement (doi:10.1371/journal.pbio.3000532), 2019-11-07
Supplement: S10 (10.1371/journal.pbio.3000532.s010) [file journal.pbio.3000532.s010]

Gel 1A

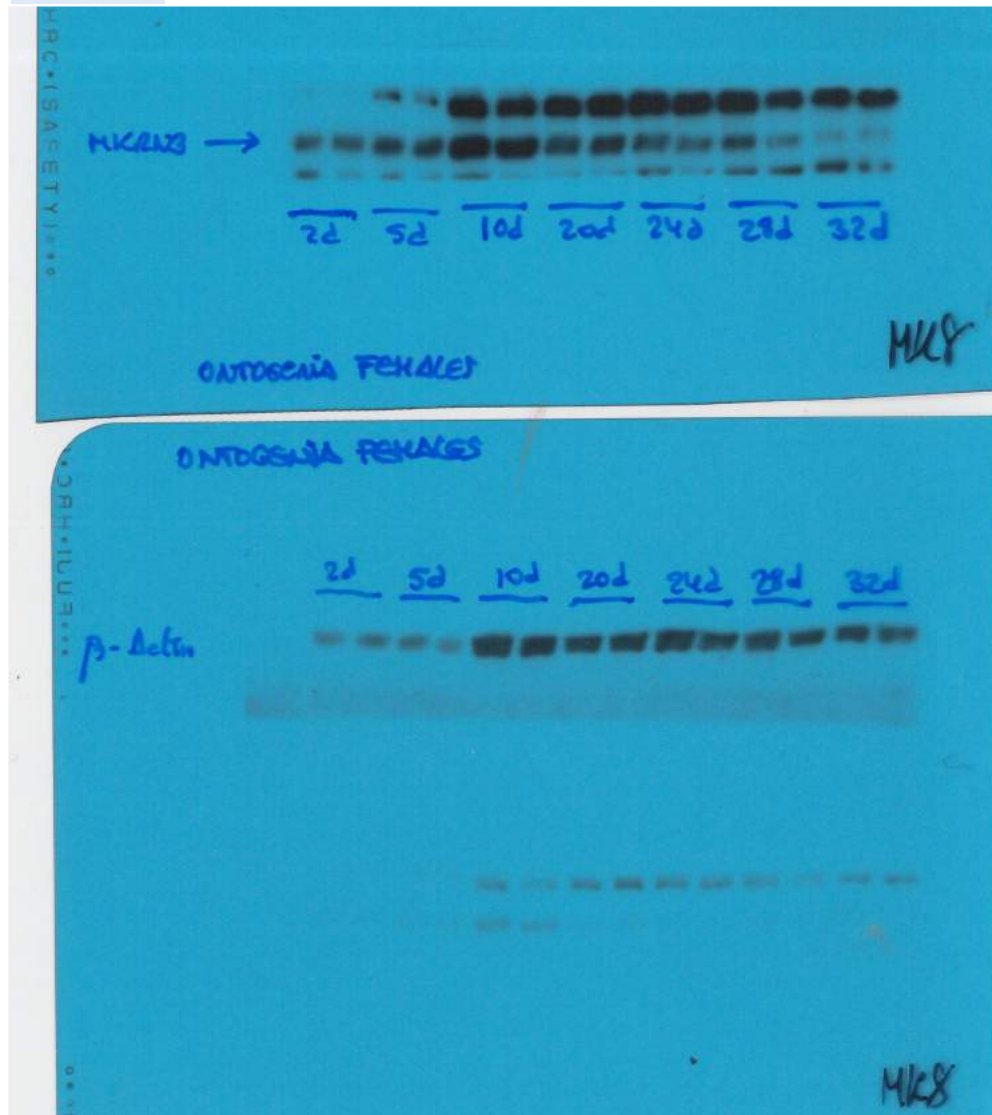

Gel 1B

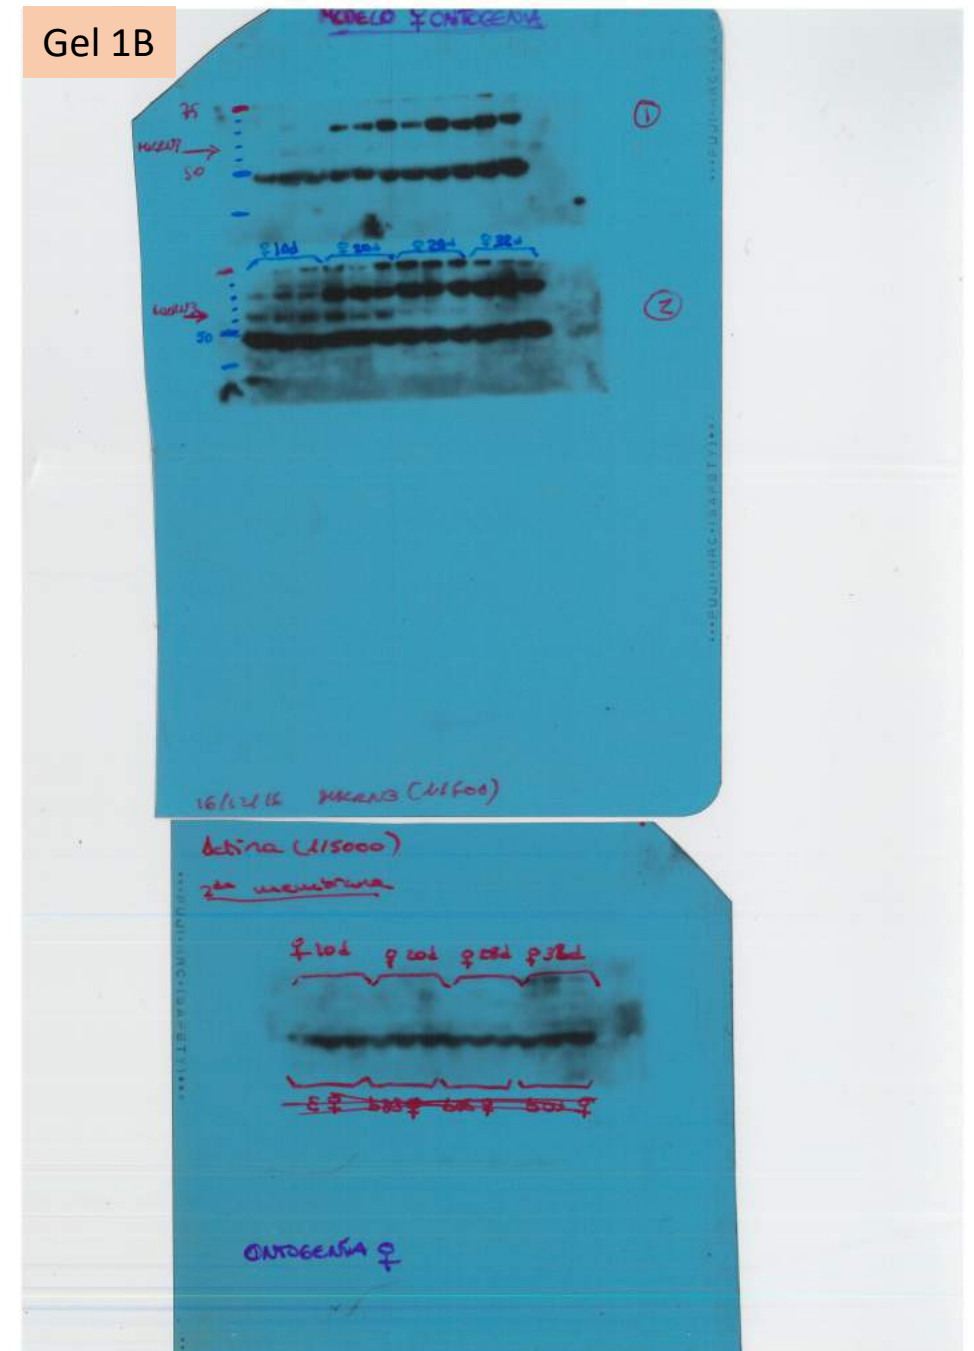

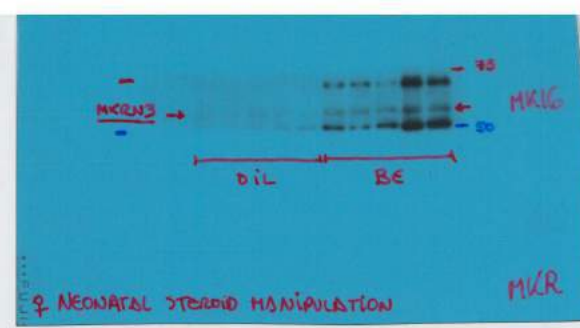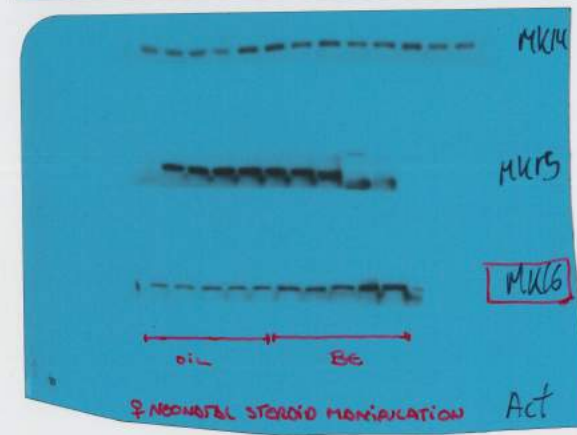

Uncropped WB Figure 3C

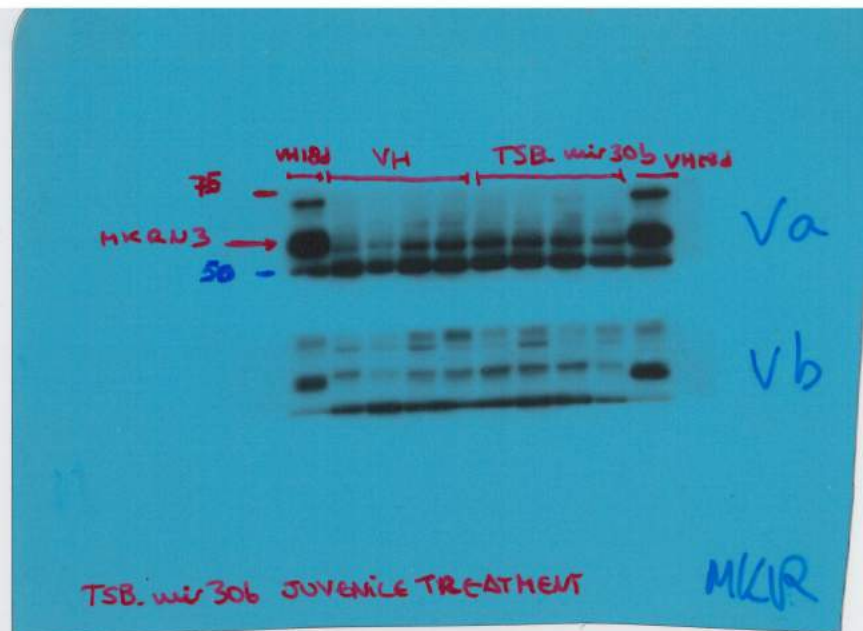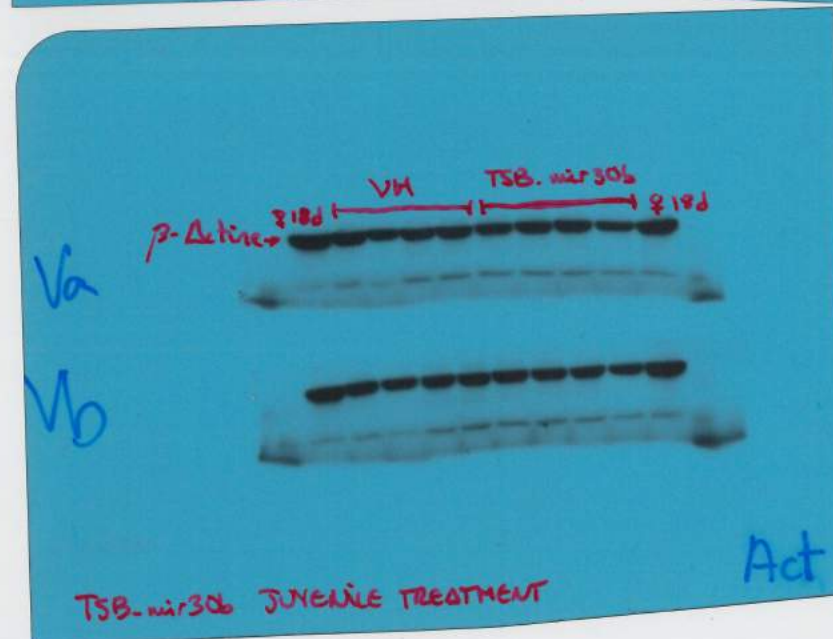

Uncropped WB Figure 5F

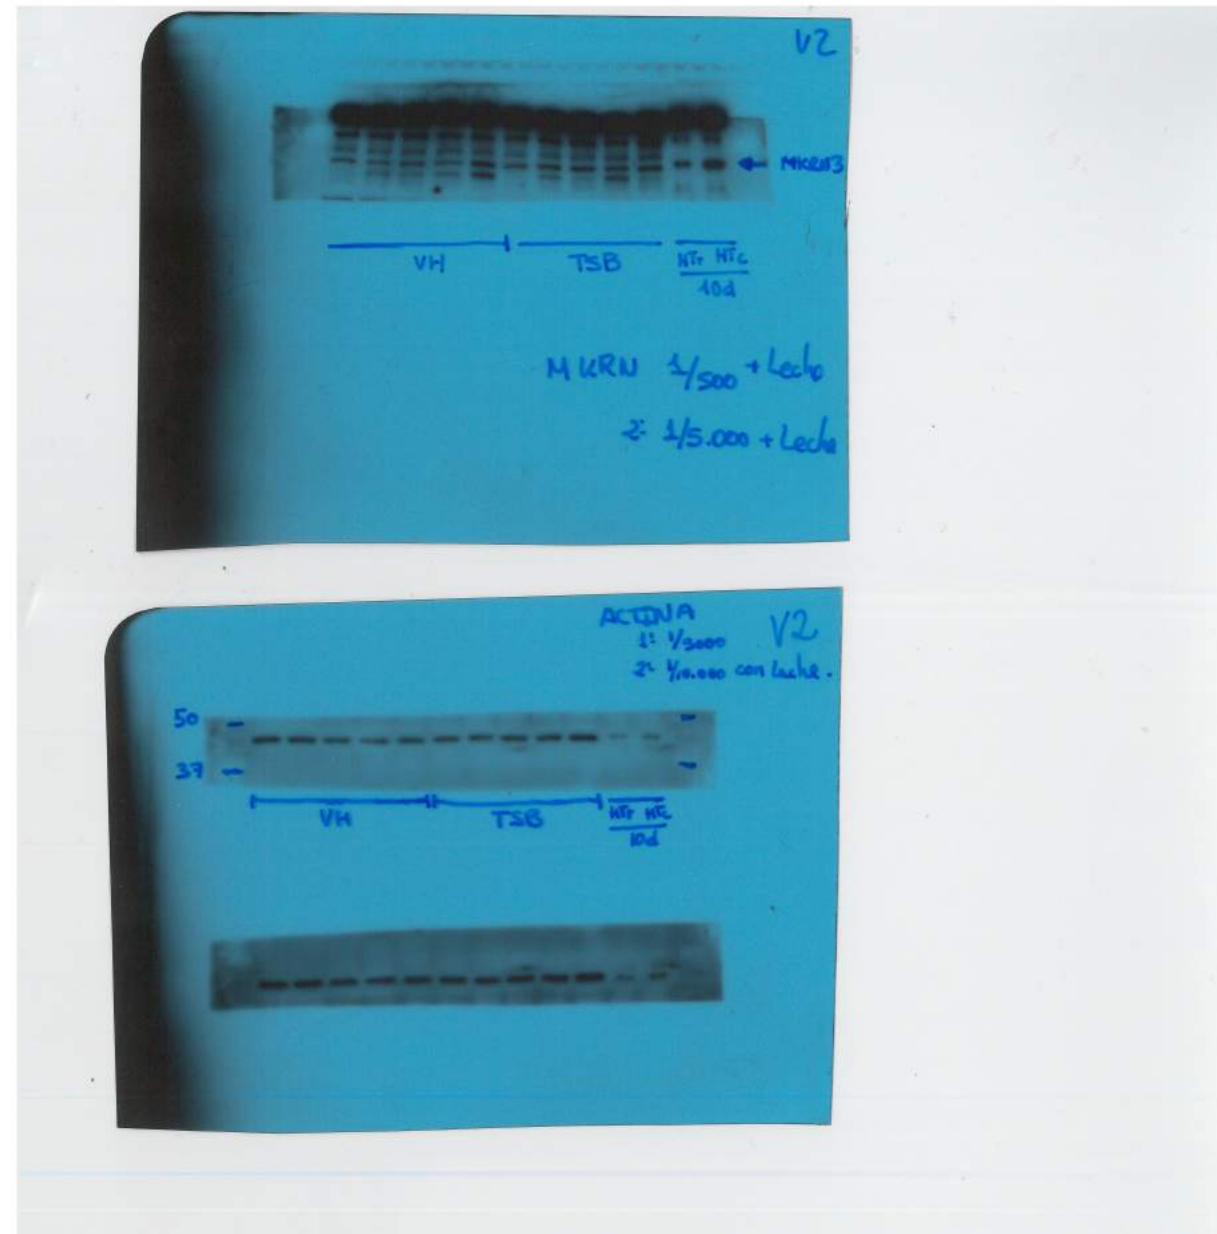

Uncropped WB Suppl. Figure 8D
